# Supplementary material for: Selective loading of platinum or silver cocatalyst onto a hydrogen-evolution photocatalyst in a silver-mediated all solid-state Z-scheme system for enhanced overall water splitting
Source: Royal Society of Chemistry journal article supplement (doi:10.1039/c9ra09421k), 2019-01-01
Supplement: c9ra09421k1.pdf [file c9ra09421k1.pdf]

Electronic Supplementary Information (ESI) for

## **Selective loading of platinum or silver cocatalyst onto a hydrogen-evolution photocatalyst in a silver-mediated all solid-state Z-scheme system for enhanced overall water splitting**

Junya Osaki,<sup>a</sup> Masaomi Yoda,<sup>b</sup> Toshihiro Takashima<sup>ab</sup> and Hiroshi Irie<sup>\*ab</sup>

<sup>a</sup>*Special Doctoral Program for Green Energy Conversion Science and Technology, Integrated Graduate School of Medicine, Engineering, and Agricultural Sciences, University of Yamanashi, 4-3-11 Takeda, Kofu, Yamanashi 400-8511, Japan.*

<sup>b</sup>*Clean Energy Research Center, University of Yamanashi, 4-3-11 Takeda, Kofu, Yamanashi 400-8511, Japan.*

### Contents

ESI-1) Detailed preparation and characterization procedures.

ESI-2) XRD characterization (Fig. S1).

ESI-3) Bi 4f, Ag 3d, and Pt 4f peak deconvolutions (Fig. S2, Table S1, Table S2).

ESI-4) SEM images SEM image of the prepared photocatalysts, ZnRh<sub>2</sub>O<sub>4</sub>/Ag/Bi<sub>4</sub>V<sub>2</sub>O<sub>11</sub>, Pt/ZnRh<sub>2</sub>O<sub>4</sub>/Ag/Bi<sub>4</sub>V<sub>2</sub>O<sub>11</sub>, and Ag/ZnRh<sub>2</sub>O<sub>4</sub>/Ag/Bi<sub>4</sub>V<sub>2</sub>O<sub>11</sub>.

ESI-5) Enlargement of Figs. 3a-3f (STEM images).

ESI-6) Energy band diagram and charge transfer process for ZnRh<sub>2</sub>O<sub>4</sub>/Ag/Bi<sub>4</sub>V<sub>2</sub>O<sub>11</sub> (Scheme S1).

ESI-7) H<sub>2</sub> and O<sub>2</sub> generation rates under 700-nm LED light sources, incident photon rates, and AQE values for overall pure-water splitting (Table S3).

## ESI-1) Detailed preparation and characterization procedures.

A powdered photocatalyst composed of  $\text{ZnRh}_2\text{O}_4$ ,  $\text{Bi}_4\text{V}_2\text{O}_{11}$ , and Ag ( $\text{ZnRh}_2\text{O}_4/\text{Ag}/\text{Bi}_4\text{V}_2\text{O}_{11}$ ) was prepared using the following method. First,  $\text{ZnRh}_2\text{O}_4$  and  $\text{Bi}_4\text{V}_2\text{O}_{11}$  powders were synthesized using a solid-state reaction method. As starting materials, commercial ZnO (Wako, purity 99.0%) and  $\text{Rh}_2\text{O}_3$  powders (Kanto Kagaku, purity 99.9%) were used for  $\text{ZnRh}_2\text{O}_4$ , and  $\text{Bi}_2\text{O}_3$  (Kanto Kagaku, purity 99.9%) and  $\text{V}_2\text{O}_5$  powders (Kanto Kagaku, purity 99.0%) were used for  $\text{Bi}_4\text{V}_2\text{O}_{11}$ . Stoichiometric amounts of the starting materials for both materials were wet-ball-milled for 20 h in polyethylene bottles using zirconium dioxide ( $\text{ZrO}_2$ ) balls as the milling medium. The resulting mixtures were calcined at 1150 °C for 24 h and 850 °C for 8 h to obtain  $\text{ZnRh}_2\text{O}_4$  and  $\text{Bi}_4\text{V}_2\text{O}_{11}$  powders, respectively, which were then thoroughly ground. Only the  $\text{Bi}_4\text{V}_2\text{O}_{11}$  powder was subsequently soaked and stirred in distilled water for 20 h, followed by filtration and drying at 65°C for 12 h.

The obtained  $\text{ZnRh}_2\text{O}_4$  and  $\text{Bi}_4\text{V}_2\text{O}_{11}$  powders and commercial  $\text{Ag}_2\text{O}$  powder, with a molar ratio of 1.0:1.2:1.0, were wet-ball-milled as described above. The mixed powders were pressed into pellets by applying a force of 60 kN, and the obtained pellets were heated at 750°C for 2 h. After grinding the pellets into a fine powder, the powder was soaked in a 3 M nitric acid ( $\text{HNO}_3$ , Kanto Kagaku) aqueous solution for 5 min. The powder was then filtered and washed thoroughly with distilled water and dried at 65°C for 12 h.

Photodeposition of Pt was conducted by first dispersing 80 mg  $\text{ZnRh}_2\text{O}_4/\text{Ag}/\text{Bi}_4\text{V}_2\text{O}_{11}$  in 40 mL formaldehyde solution (25 vol%) containing 10 mL of 8.65 mM hexachloroplatinic acid ( $\text{H}_2\text{PtCl}_6 \cdot 6\text{H}_2\text{O}$ , >98.5%; Kanto Kagaku) solution as the source of Pt. The suspension was then deaerated using liquid nitrogen ( $\text{N}_2$ ) and illuminated by a light-emitting diode (LED) lamp with a wavelength of 850 nm (LEDH60-850; Hamamatsu Photonics) equipped with an optical filter (IR85N; HOYA) for 35 h under constant stirring. This light condition was used for the selective photo-excitation of  $\text{ZnRh}_2\text{O}_4$  due to its band-gap energy of 1.2 eV, which is lower than that of  $\text{Bi}_4\text{V}_2\text{O}_{11}$ , which has a band-gap of 1.7 eV. The resulting sample was obtained by filtration, washed, and dried at 80 °C overnight. For the photodeposition of Ag, 80 mg  $\text{ZnRh}_2\text{O}_4/\text{Ag}/\text{Bi}_4\text{V}_2\text{O}_{11}$  was dispersed in 40 mL formaldehyde solution (25 vol%) containing 10 mL of 18 mM silver nitrate ( $\text{AgNO}_3$ , >99%; Kanto Kagaku) solution as the source of Ag. The suspension was then deaerated using liquid  $\text{N}_2$  and illuminated using the 850-nm LED equipped with the IR85N optical filter for 20 h under stirring.

The crystal structures of the prepared powders were determined by X-ray diffraction (XRD) using a PW-1700 instrument (PANalytical). UV-visible absorption (UV-vis) spectra were obtained by the diffuse reflection method using a spectrometer (V-650, Jasco) with barium sulfate ( $\text{BaSO}_4$ ) as the reflectance standard. The Bi 4f, V 2p, Zn 2p, Rh 3d, Ag 3d, and Pt 4f core levels were measured by X-ray photoelectron spectroscopy (XPS; Axis-Ultra, Shimadzu). The peaks were calibrated using the C 1s peak derived from a hydrocarbon surface contaminant with a binding energy of 284.6 eV. To quantitatively evaluate the valency and percentages of Ag and Pt contained in the photocatalysts, peak deconvolution was performed using a Gaussian lineshape. A scanning electron microscope (SEM, JSM-6500F, JEOL) was used to observe the morphology of the prepared photocatalysts. A scanning transmission electron microscope (STEM, Tecnai Osiris,

FEI) and energy-dispersive X-ray spectrometer (EDS) were also utilized for elemental mapping.

Photocatalytic overall water-splitting tests were conducted in a gas-closed circulation system. The composite photocatalysts (60 mg) were suspended in 12 mL pure water (pH unadjusted) under an argon atmosphere (50 kPa) after repeated evacuation down to 2.5 Pa with constant stirring using a magnetic stirrer. LED lamps with a wavelength of 700 nm (LEDH60-700, Hamamatsu Photonics) was used for light irradiation. The amounts of evolved H<sub>2</sub> and O<sub>2</sub> were monitored using an online gas chromatograph (GC-8A, Shimadzu). We previously reported that the induction period for H<sub>2</sub> and O<sub>2</sub> evolution is up to ~100 h under 700-nm light irradiation;<sup>6,7</sup> however, this delay in H<sub>2</sub> and O<sub>2</sub> evolution disappeared when the water-splitting reaction was allowed to proceed following evacuation of the chamber after ~100 h light irradiation. Thus, in the present study, all of the plotted data for H<sub>2</sub> and O<sub>2</sub> evolution was collected following evacuation of the chamber after ~100 h 700-nm light irradiation.

The apparent quantum efficiency (AQE) values were calculated using the amount of evolved H<sub>2</sub> and the equation: AQE (%) = 100 × 4 × H<sub>2</sub> generation rate/incident photon rate, because H<sub>2</sub> generation in the two-step system is a four-electron process (after reference, Y. Sasaki, H. Nemoto, K. Saito and A. Kudo, *J. Phys. Chem. C*, 2009, **113**, 17536–17542.).

ESI-2) XRD and SEM characterization (Fig. S1).

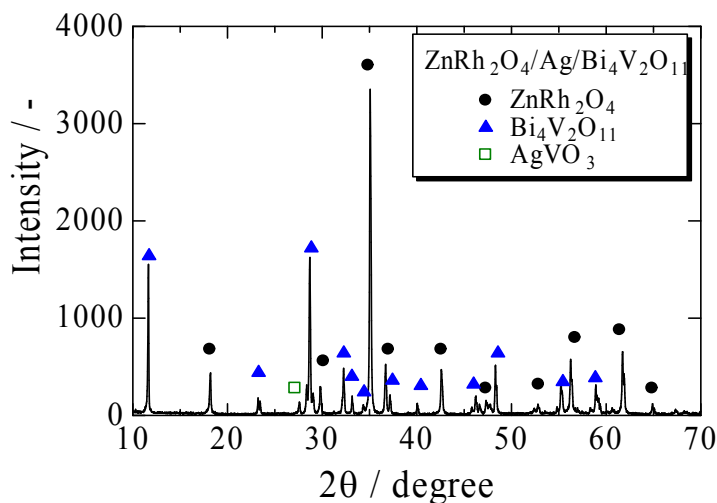

**Fig. S1** Powder XRD pattern of ZnRh<sub>2</sub>O<sub>4</sub>/Ag/Bi<sub>4</sub>V<sub>2</sub>O<sub>11</sub>.

### ESI-3) Bi 4f, Ag 3d, and Pt 4f peak deconvolutions (Fig. S2)

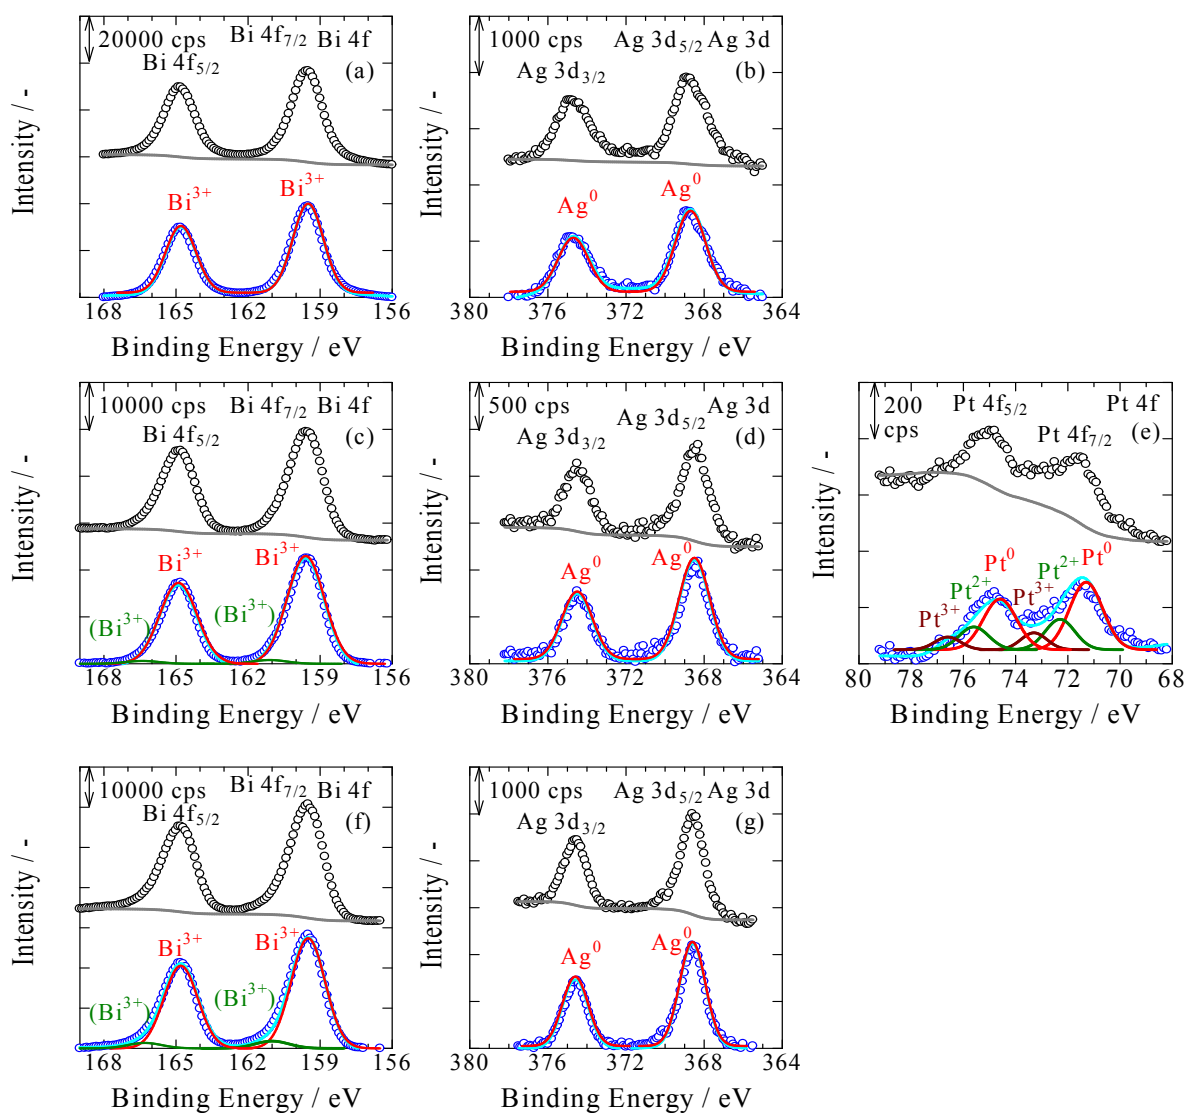

**Fig. S2** XPS spectra for Bi 4f (Bi 4<sub>5/2</sub>, Bi 4<sub>7/2</sub>) (a) and Ag 3d (Ag 3d<sub>3/2</sub>, Ag 3d<sub>5/2</sub>) (b) of ZnRh<sub>2</sub>O<sub>4</sub>/Ag/Bi<sub>4</sub>V<sub>2</sub>O<sub>11</sub>, Bi 4f (Bi 4<sub>5/2</sub>, Bi 4<sub>7/2</sub>) (c), Ag 3d (Ag 3d<sub>3/2</sub>, Ag 3d<sub>5/2</sub>) (d) and Pt 4f (Pt 4<sub>5/2</sub>, Pt 4<sub>7/2</sub>) (e) of Pt/ZnRh<sub>2</sub>O<sub>4</sub>/Ag/Bi<sub>4</sub>V<sub>2</sub>O<sub>11</sub>, and Bi 4f (Bi 4<sub>5/2</sub>, Bi 4<sub>7/2</sub>) (f) and Ag 3d (Ag 3d<sub>3/2</sub>, Ag 3d<sub>5/2</sub>) (g) of Ag/ZnRh<sub>2</sub>O<sub>4</sub>/Ag/Bi<sub>4</sub>V<sub>2</sub>O<sub>11</sub>. The blue open circles in the lower part of each plot were generated by subtracting the background (gray line, upper) from the experimental XPS data (black open plots, upper). The blue open plots and fitted curves (light blue lines, i.e., the sum of the contributions obtained by deconvolution (red, green, and brown lines) closely coincided.

**Table S1** Peak deconvolution results for ZnRh<sub>2</sub>O<sub>4</sub>/Ag/Bi<sub>4</sub>V<sub>2</sub>O<sub>11</sub>, Pt/ZnRh<sub>2</sub>O<sub>4</sub>/Ag/Bi<sub>4</sub>V<sub>2</sub>O<sub>11</sub>, and Ag/ZnRh<sub>2</sub>O<sub>4</sub>/Ag/Bi<sub>4</sub>V<sub>2</sub>O<sub>11</sub>. The peak positions (eV), full widths at half maximum (FWHM, eV), and areas for each contribution to the deconvolution, and the peak area ratios of Bi 4f<sub>5/2</sub> to Bi 4f<sub>7/2</sub>, Ag 3d<sub>3/2</sub> to Ag 3d<sub>5/2</sub>, and Pt 4f<sub>5/2</sub> to Pt 4f<sub>7/2</sub> are also shown.

| Photocatalyst                                                                              |                                                  | Bi                   |                      |                                                  |                      | Ag                                             |                      |
|--------------------------------------------------------------------------------------------|--------------------------------------------------|----------------------|----------------------|--------------------------------------------------|----------------------|------------------------------------------------|----------------------|
|                                                                                            |                                                  | Bi <sup>3+</sup>     |                      | Bi <sup>3+*</sup>                                |                      | Ag <sup>0</sup>                                |                      |
|                                                                                            |                                                  | Bi 4f <sub>7/2</sub> | Bi 4f <sub>5/2</sub> | Bi 4f <sub>7/2</sub>                             | Bi 4f <sub>5/2</sub> | Ag 3d <sub>5/2</sub>                           | Ag 3d <sub>3/2</sub> |
| ZnRh <sub>2</sub> O <sub>4</sub> /Ag/<br>Bi <sub>4</sub> V <sub>2</sub> O <sub>11</sub>    | BE (eV)                                          | 159.5                | 164.8                | /                                                |                      | 368.7                                          | 374.7                |
|                                                                                            | FWHM                                             | 1.50                 | 1.50                 |                                                  |                      | 1.83                                           | 1.83                 |
|                                                                                            | Area                                             | 60600                | 45500                |                                                  |                      | 2808                                           | 1872                 |
|                                                                                            | (Bi 4f <sub>5/2</sub> )/(Bi 4f <sub>7/2</sub> )= | 0.75                 |                      |                                                  |                      | (Ag 3d <sub>3/2</sub> )/Ag 3d <sub>5/2</sub> = |                      |
| Pt/ZnRh <sub>2</sub> O <sub>4</sub> /Ag/<br>Bi <sub>4</sub> V <sub>2</sub> O <sub>11</sub> | BE (eV)                                          | 159.6                | 164.9                | 161.1                                            | 166.4                | 368.5                                          | 374.5                |
|                                                                                            | FWHM                                             | 1.83                 | 1.83                 | 1.67                                             | 1.67                 | 1.83                                           | 1.83                 |
|                                                                                            | Area                                             | 44800                | 33600                | 1420                                             | 1060                 | 2110                                           | 1410                 |
|                                                                                            | (Bi 4f <sub>5/2</sub> )/(Bi 4f <sub>7/2</sub> )= | 0.75                 |                      | (Bi 4f <sub>5/2</sub> )/(Bi 4f <sub>7/2</sub> )= |                      | 0.75                                           |                      |
| Ag/ZnRh <sub>2</sub> O <sub>4</sub> /Ag/<br>Bi <sub>4</sub> V <sub>2</sub> O <sub>11</sub> | BE (eV)                                          | 159.5                | 164.8                | 161.0                                            | 166.3                | 368.6                                          | 374.6                |
|                                                                                            | FWHM                                             | 1.67                 | 1.67                 | 1.66511                                          | 1.66511              | 1.55                                           | 1.55                 |
|                                                                                            | Area                                             | 48600                | 36400                | 3190                                             | 2390                 | 3660                                           | 2440                 |
|                                                                                            | (Bi 4f <sub>5/2</sub> )/(Bi 4f <sub>7/2</sub> )= | 0.75                 |                      | (Bi 4f <sub>5/2</sub> )/(Bi 4f <sub>7/2</sub> )= |                      | 0.75                                           |                      |
|                                                                                            |                                                  | Pt                   |                      |                                                  |                      |                                                |                      |
|                                                                                            |                                                  | Pt <sup>0</sup>      |                      | Pt <sup>2+</sup>                                 |                      | Pt <sup>2+</sup>                               |                      |
|                                                                                            |                                                  | Pt 4f <sub>7/2</sub> | Pt 4f <sub>5/2</sub> | Pt 4f <sub>7/2</sub>                             | Pt 4f <sub>5/2</sub> | Pt 4f <sub>7/2</sub>                           | Pt 4f <sub>5/2</sub> |
| ZnRh <sub>2</sub> O <sub>4</sub> /Ag/<br>Bi <sub>4</sub> V <sub>2</sub> O <sub>11</sub>    | BE (eV)                                          | /                    |                      |                                                  |                      |                                                |                      |
|                                                                                            | FWHM                                             |                      |                      |                                                  |                      |                                                |                      |
|                                                                                            | Area                                             |                      |                      |                                                  |                      |                                                |                      |
|                                                                                            | (Pt 4f <sub>5/2</sub> )/(Pt 4f <sub>7/2</sub> )= |                      |                      |                                                  |                      |                                                |                      |
| Pt/ZnRh <sub>2</sub> O <sub>4</sub> /Ag/<br>Bi <sub>4</sub> V <sub>2</sub> O <sub>11</sub> | BE (eV)                                          | 71.3                 | 74.6                 | 72.3                                             | 75.6                 | 73.3                                           | 76.6                 |
|                                                                                            | FWHM                                             | 1.50                 | 1.50                 | 1.33                                             | 1.33                 | 1.17                                           | 1.17                 |
|                                                                                            | Area                                             | 383                  | 287                  | 153                                              | 115                  | 74                                             | 56                   |
|                                                                                            | (Pt 4f <sub>5/2</sub> )/(Pt 4f <sub>7/2</sub> )= | 0.75                 |                      | (Pt 4f <sub>5/2</sub> )/(Pt 4f <sub>7/2</sub> )= |                      | 0.75                                           |                      |
| Ag/ZnRh <sub>2</sub> O <sub>4</sub> /Ag/<br>Bi <sub>4</sub> V <sub>2</sub> O <sub>11</sub> | BE (eV)                                          | /                    |                      |                                                  |                      |                                                |                      |
|                                                                                            | FWHM                                             |                      |                      |                                                  |                      |                                                |                      |
|                                                                                            | Area                                             |                      |                      |                                                  |                      |                                                |                      |
|                                                                                            | (Pt 4f <sub>5/2</sub> )/(Pt 4f <sub>7/2</sub> )= |                      |                      |                                                  |                      |                                                |                      |

**Table S2** Ag and Pt weight percentages including in ZnRh<sub>2</sub>O<sub>4</sub>/Ag/Bi<sub>4</sub>V<sub>2</sub>O<sub>11</sub>, Pt/ZnRh<sub>2</sub>O<sub>4</sub>/Ag/Bi<sub>4</sub>V<sub>2</sub>O<sub>11</sub>, and Ag/ZnRh<sub>2</sub>O<sub>4</sub>/Ag/Bi<sub>4</sub>V<sub>2</sub>O<sub>11</sub>.

| Photocatalyst                                                                          | Ag / wt% <sup>*1)</sup> | Pt / wt% <sup>*1)</sup> | Inserted Ag / wt%  | Ag as a cocatalyst / wt% | Pt as a cocatalyst / wt% |
|----------------------------------------------------------------------------------------|-------------------------|-------------------------|--------------------|--------------------------|--------------------------|
| ZnRh <sub>2</sub> O <sub>4</sub> /Ag/Bi <sub>4</sub> V <sub>2</sub> O <sub>11</sub>    | 2.1                     | /                       | 2.1                | /                        |                          |
| Pt/ZnRh <sub>2</sub> O <sub>4</sub> /Ag/Bi <sub>4</sub> V <sub>2</sub> O <sub>11</sub> | 2.1                     | 1.2                     | 2.1                | /                        | 1.2                      |
| Ag/ZnRh <sub>2</sub> O <sub>4</sub> /Ag/Bi <sub>4</sub> V <sub>2</sub> O <sub>11</sub> | 3.2                     | /                       | 2.1 <sup>*2)</sup> | 1.1 <sup>*3)</sup>       | /                        |

\*1) Obtained value (vs. 1.0 mol of ZnRh<sub>2</sub>O<sub>4</sub> + 1.2 mol of Bi<sub>4</sub>V<sub>2</sub>O<sub>11</sub>) from the peak deconvolution results in Table S1.

\*2) Estimated value based on the assumption that the amount of inserted Ag was identical to that in ZnRh<sub>2</sub>O<sub>4</sub>/Ag/Bi<sub>4</sub>V<sub>2</sub>O<sub>11</sub> and Pt/ZnRh<sub>2</sub>O<sub>4</sub>/Ag/Bi<sub>4</sub>V<sub>2</sub>O<sub>11</sub>.

\*3) Calculated value based on the assumption that the amount of inserted Ag was 2.1 wt%.

ESI-4) SEM images SEM image of the prepared photocatalysts,  $\text{ZnRh}_2\text{O}_4/\text{Ag}/\text{Bi}_4\text{V}_2\text{O}_{11}$ ,  $\text{Pt}/\text{ZnRh}_2\text{O}_4/\text{Ag}/\text{Bi}_4\text{V}_2\text{O}_{11}$ , and  $\text{Ag}/\text{ZnRh}_2\text{O}_4/\text{Ag}/\text{Bi}_4\text{V}_2\text{O}_{11}$ .

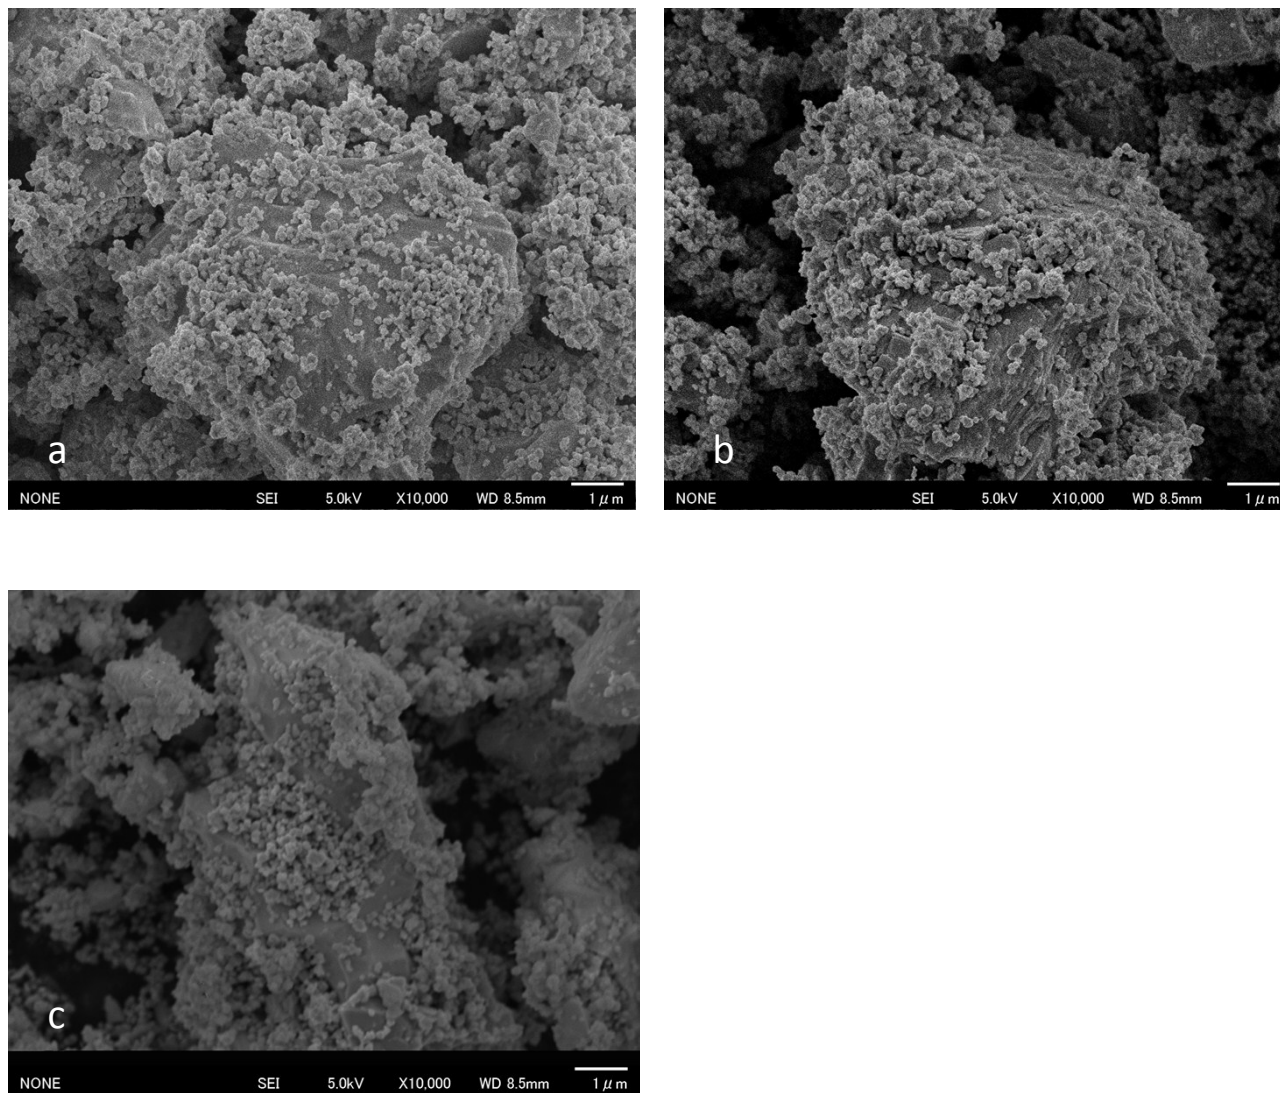

**Fig. S3** SEM images of  $\text{ZnRh}_2\text{O}_4/\text{Ag}/\text{Bi}_4\text{V}_2\text{O}_{11}$  (a),  $\text{Pt}/\text{ZnRh}_2\text{O}_4/\text{Ag}/\text{Bi}_4\text{V}_2\text{O}_{11}$  (b), and  $\text{Ag}/\text{ZnRh}_2\text{O}_4/\text{Ag}/\text{Bi}_4\text{V}_2\text{O}_{11}$  (c).

ESI-5) Enlargement of Figs. 3a-3f (STEM images)

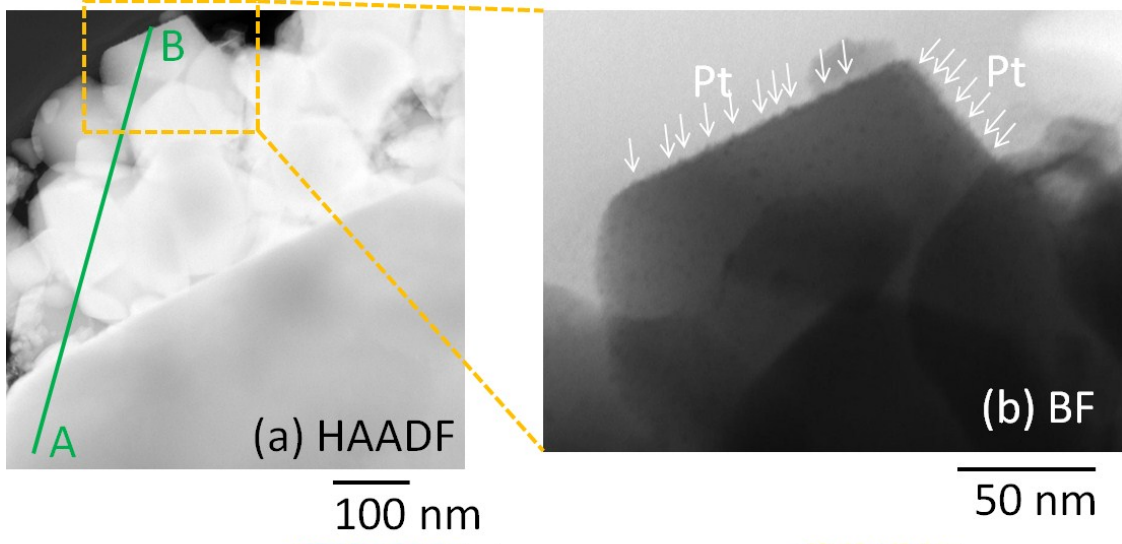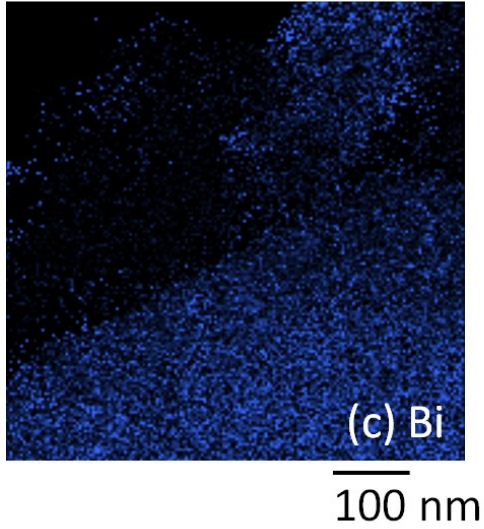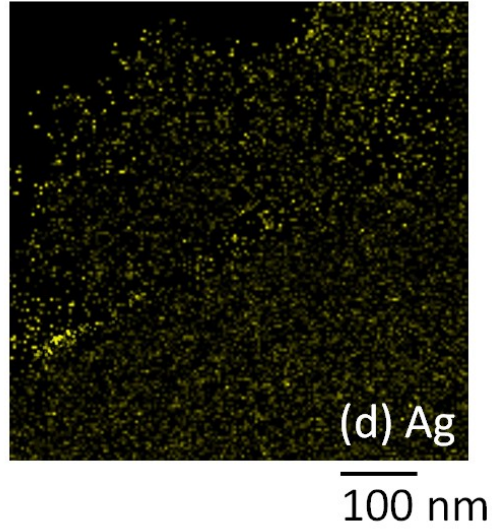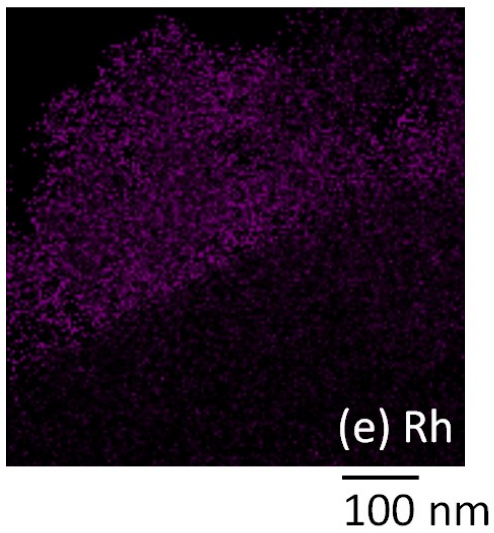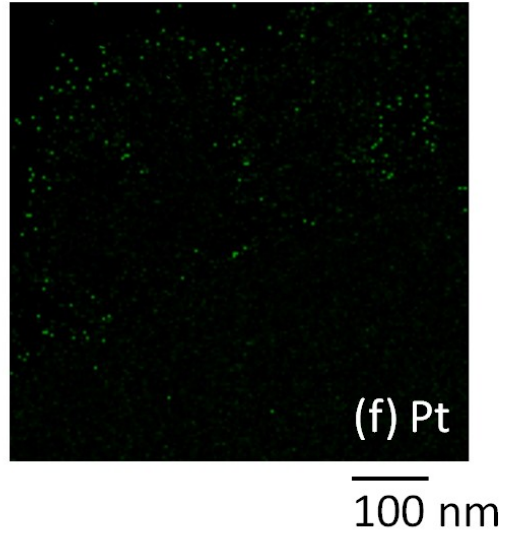

ESI-6) Energy band diagram and charge transfer process for  $\text{ZnRh}_2\text{O}_4/\text{Ag}/\text{Bi}_4\text{V}_2\text{O}_{11}$  (Scheme S1).

The band edge positions of  $\text{ZnRh}_2\text{O}_4$ , Ag, and  $\text{Bi}_4\text{V}_2\text{O}_{11}$  are described in Scheme S1a after our previous paper.<sup>9</sup> The band alignments of  $\text{ZnRh}_2\text{O}_4$ , Ag, and  $\text{Bi}_4\text{V}_2\text{O}_{11}$  before and after the mixing and calcination of Ag and  $\text{ZnRh}_2\text{O}_4$ , and Ag and  $\text{Bi}_4\text{V}_2\text{O}_{11}$  are shown in Scheme S1b. It should be noted that the uncertainty in the band edge positions for  $\text{ZnRh}_2\text{O}_4$ , Ag, and  $\text{Bi}_4\text{V}_2\text{O}_{11}$  would correspond to a few tenths of an eV.

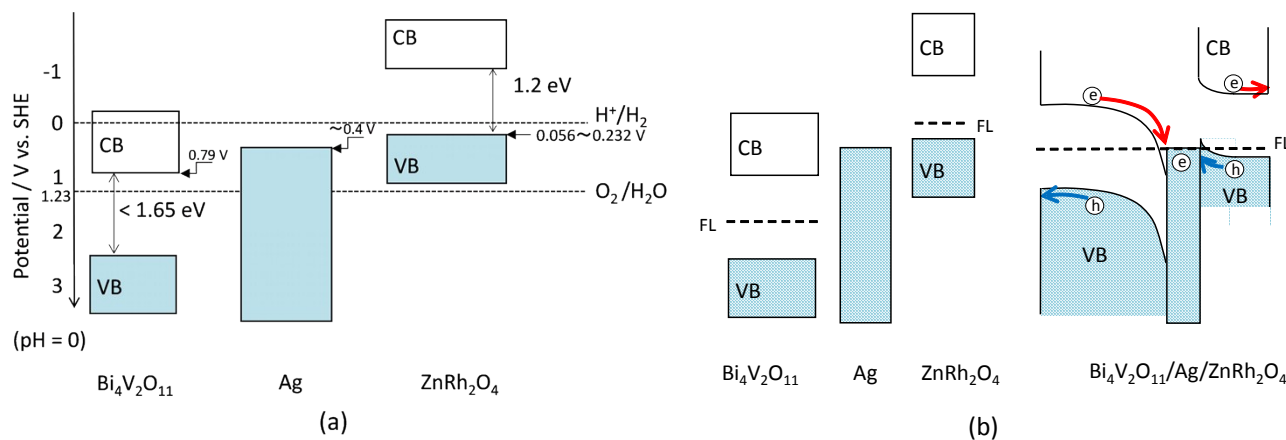

**Scheme S1** Band edge positions of  $\text{ZnRh}_2\text{O}_4$ , Ag and  $\text{Bi}_4\text{V}_2\text{O}_{11}$  (a) and their band alignments before and after the mixing and calcination of Ag and  $\text{ZnRh}_2\text{O}_4$ , and Ag and  $\text{Bi}_4\text{V}_2\text{O}_{11}$  (b). The charge transfer processes are also shown.



ESI-7) H<sub>2</sub> and O<sub>2</sub> generation rates under 700-nm LED light sources, incident photon rates, and AQE values for overall pure-water splitting (Table S3).

**Table S3** Incident photon and H<sub>2</sub> generation rates, and AQE values obtained from H<sub>2</sub> generation rates for overall pure-water splitting over ZnRh<sub>2</sub>O<sub>4</sub>/Ag/Bi<sub>4</sub>V<sub>2</sub>O<sub>11</sub>, Pt/ZnRh<sub>2</sub>O<sub>4</sub>/Ag/Bi<sub>4</sub>V<sub>2</sub>O<sub>11</sub>, and Ag/ZnRh<sub>2</sub>O<sub>4</sub>/Ag/Bi<sub>4</sub>V<sub>2</sub>O<sub>11</sub>.

| Photocatalyst                                                                          | Light intensity / mW cm <sup>-2</sup> | Incident photon rate / s <sup>-1</sup> | H <sub>2</sub> generation rate / μmol h <sup>-1</sup> | AQE (%)              |
|----------------------------------------------------------------------------------------|---------------------------------------|----------------------------------------|-------------------------------------------------------|----------------------|
| ZnRh <sub>2</sub> O <sub>4</sub> /Ag/Bi <sub>4</sub> V <sub>2</sub> O <sub>11</sub>    | 2.9                                   | 7.3×10 <sup>16</sup>                   | 1.7×10 <sup>-2</sup>                                  | 1.5×10 <sup>-2</sup> |
| Pt/ZnRh <sub>2</sub> O <sub>4</sub> /Ag/Bi <sub>4</sub> V <sub>2</sub> O <sub>11</sub> | 3.5                                   | 8.0×10 <sup>16</sup>                   | 5.0×10 <sup>-2</sup>                                  | 4.1×10 <sup>-2</sup> |
| Ag/ZnRh <sub>2</sub> O <sub>4</sub> /Ag/Bi <sub>4</sub> V <sub>2</sub> O <sub>11</sub> | 3.5                                   | 8.0×10 <sup>16</sup>                   | 5.5×10 <sup>-2</sup>                                  | 4.6×10 <sup>-2</sup> |
